# Supplementary material for: Detection of MET Polysomy by Next-generation Sequencing and Its Clinical Relevance for MET Inhibitors
Source: PubMed Central journal article supplement (PMC10072163; doi:10.1158/2767-9764.crc-22-0438), 2023-04-04
Supplement: crc-22-0438-s02.pdf [file crc-22-0438-s02.pdf]

Figure S1

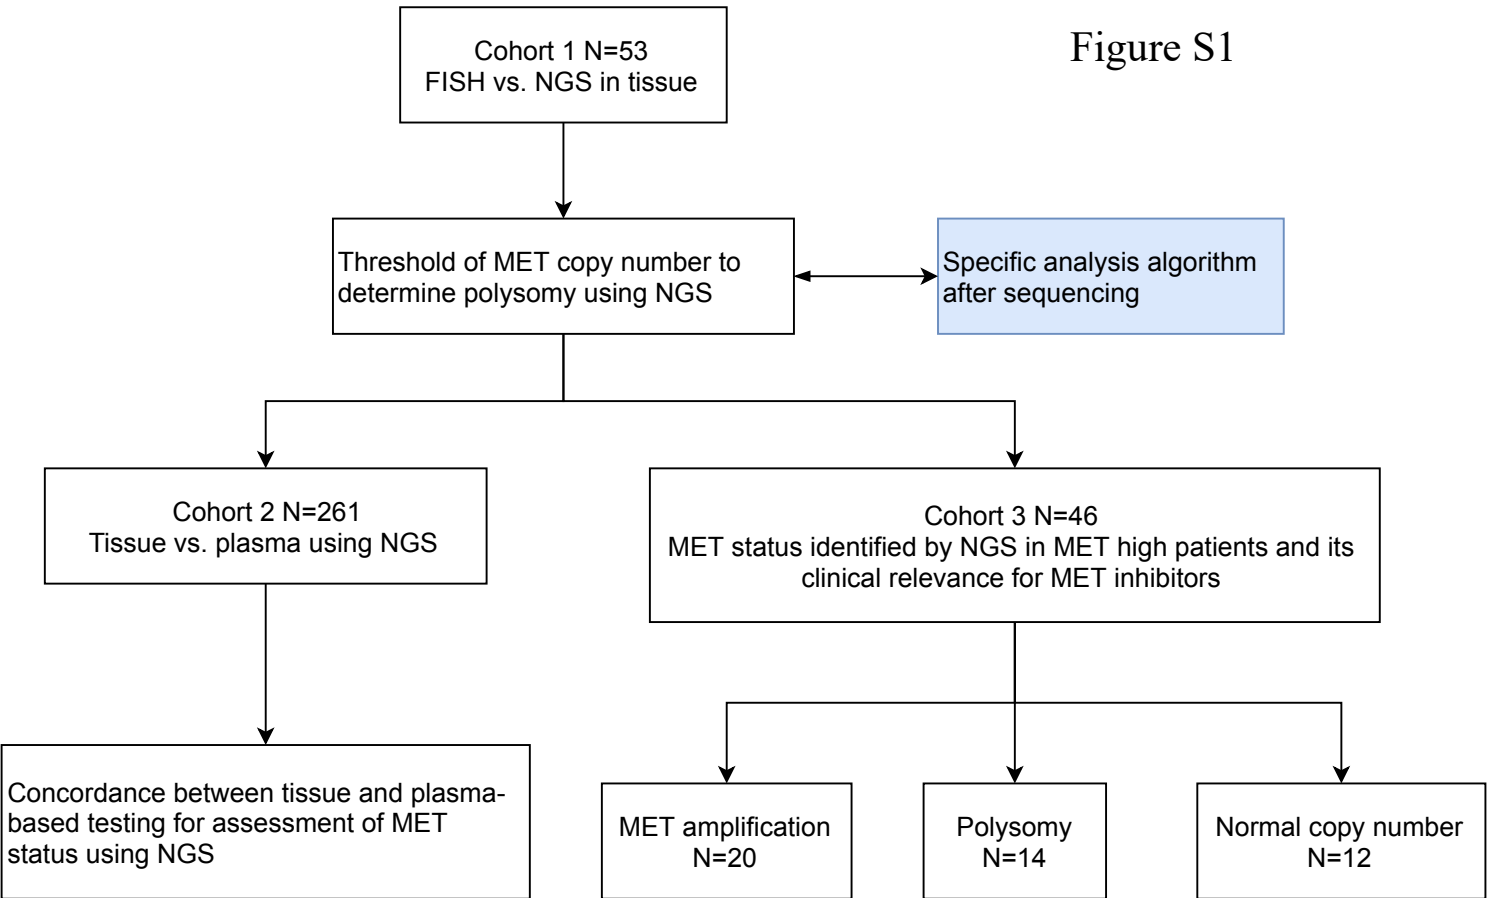

Flowchart of the study design
